# Supplementary material for: New Determinants of Aminoglycoside Resistance and Their Association with the Class 1 Integron Gene Cassettes in Trueperella pyogenes
Source: MDPI journal article supplement (doi:10.3390/ijms21124230), 2020-06-13
Supplement: s1 [file s1]

**Table S1.** MIC values of tested antimicrobials and aminoglycoside resistance phenotypes and genotypes of studied *Trueperella pyogenes* isolates (*n* = 86).

| Isolate* | MIC of<br>gentamicin<br>(µg/mL) | MIC of<br>streptomycin<br>(µg/mL) | MIC of<br>kanamycin<br>(µg/mL) | Resistance<br>phenotype** | Resistance genotype                                 |
|----------|---------------------------------|-----------------------------------|--------------------------------|---------------------------|-----------------------------------------------------|
| 1/ANT    | 0.5                             | 2                                 | 1                              | -                         | -                                                   |
| 1/O      | 0.25                            | 4                                 | 0.5                            | -                         | class 1 <i>intI</i>                                 |
| 2/O      | 0.25                            | 4                                 | 4                              | -                         | class 1 <i>intI</i>                                 |
| 3/O      | 0.5                             | 8                                 | 1                              | STR                       | class 1 <i>intI</i>                                 |
| 4/O      | 0.5                             | 2                                 | 1                              | -                         | class 1 <i>intI</i>                                 |
| 5/O      | 0.5                             | 2                                 | 2                              | -                         | class 1 <i>intI</i>                                 |
| 1/K      | 0.5                             | 2                                 | 4                              | -                         | class 1 <i>intI</i><br><i>aph(3')-IIIa</i>          |
| 2/K      | 0.5                             | 2                                 | 1                              | -                         | class 1 <i>intI</i>                                 |
| 4/K      | 0.5                             | 2                                 | 2                              | -                         | class 1 <i>intI</i>                                 |
| 5/K      | 1                               | 2                                 | 0.25                           | -                         | class 1 <i>intI</i>                                 |
| 6/K      | 1                               | >128                              | 0.5                            | STR                       | class 1 <i>intI</i> – gene cassette – <i>aadA9</i>  |
| 7/K      | 0.25                            | 4                                 | 0.5                            | -                         | class 1 <i>intI</i>                                 |
| 8/K      | 1                               | 4                                 | 0.5                            | -                         | class 1 <i>intI</i>                                 |
| 9/K      | 1                               | 4                                 | 1                              | -                         | class 1 <i>intI</i>                                 |
| 1/Z      | 0.5                             | 2                                 | 1                              | -                         | -                                                   |
| 2/Z      | 0.5                             | 2                                 | 1                              | -                         | -                                                   |
| 3/Z      | 0.5                             | 2                                 | 4                              | -                         | -                                                   |
| 4/Z      | 0.5                             | 2                                 | 4                              | -                         | -                                                   |
| 5/Z      | 0.5                             | 2                                 | 1                              | -                         | -                                                   |
| 6/Z      | 0.5                             | 2                                 | 0.25                           | -                         | -                                                   |
| 7/Z      | 0.5                             | 4                                 | ≤0.125                         | -                         | -                                                   |
| 8/Z      | 0.5                             | 4                                 | 0.5                            | -                         | -                                                   |
| 9/Z      | 0.25                            | 2                                 | 1                              | -                         | -                                                   |
| 10/Z     | ≤0.125                          | 2                                 | 4                              | -                         | -                                                   |
| 11/Z     | 0.25                            | 2                                 | 32                             | KAN                       | class 1 <i>intI</i>                                 |
| 12/Z     | 0.25                            | 2                                 | 2                              | -                         | -                                                   |
| 14/Z     | 0.5                             | 2                                 | 0.5                            | -                         | -                                                   |
| 15/Z     | 0.5                             | 2                                 | 2                              | -                         | -                                                   |
| 16/Z     | 1                               | 2                                 | 0.5                            | -                         | -                                                   |
| 17/Z     | 1                               | 2                                 | ≤0.125                         | -                         | -                                                   |
| 18/Z     | 0.5                             | 2                                 | 1                              | -                         | class 1 <i>intI</i>                                 |
| 19/Z     | 0.5                             | 2                                 | 0.25                           | -                         | -                                                   |
| 20/Z     | 0.5                             | 2                                 | 4                              | -                         | class 1 <i>intI</i>                                 |
| 21/Z     | 0.5                             | 4                                 | 2                              | -                         | class 1 <i>intI</i>                                 |
| 22/Z     | 0.5                             | 2                                 | 8                              | KAN                       | -                                                   |
| 23/Z     | 0.5                             | 4                                 | 2                              | -                         | -                                                   |
| 24/Z     | 0.5                             | 4                                 | 1                              | -                         | -                                                   |
| 25/Z     | 0.5                             | 4                                 | 2                              | -                         | class 1 <i>intI</i>                                 |
| 26/Z     | 1                               | 4                                 | 4                              | -                         | class 1 <i>intI</i>                                 |
| 4/S      | 1                               | 32                                | 4                              | STR                       | class 1 <i>intI</i> – gene cassette – <i>aadA11</i> |
| 5/S      | 1                               | 4                                 | 2                              | -                         | -                                                   |
| 6/S      | 1                               | 2                                 | 1                              | -                         | class 1 <i>intI</i>                                 |

|      |        |      |      |           |                                                                            |
|------|--------|------|------|-----------|----------------------------------------------------------------------------|
| 7/S  | 1      | 16   | 4    | STR       | class 1 <i>intI</i> – gene cassette – <i>aadA11</i>                        |
| 8/S  | 1      | 16   | 16   | STR – KAN | class 1 <i>intI</i> – gene cassette – <i>aadA11</i>                        |
| 9/S  | 2      | 8    | 8    | STR – KAN | class 1 <i>intI</i> – gene cassette – <i>aadA11</i><br><i>aph(3')-IIIa</i> |
| 10/S | 2      | 16   | 1    | STR       | -                                                                          |
| 13/S | 1      | >128 | 0.5  | STR       | class 1 <i>intI</i>                                                        |
| 14/S | 1      | 64   | 0.5  | STR       | -                                                                          |
| 15/S | 2      | >128 | 8    | STR – KAN | class 1 <i>intI</i> – gene cassette – <i>aadA11</i><br><i>aph(3')-IIIa</i> |
| 16/S | 2      | 8    | 1    | STR       | -                                                                          |
| 17/S | 2      | 8    | 8    | STR – KAN | class 1 <i>intI</i> – gene cassette – <i>aadA11</i><br><i>aph(3')-IIIa</i> |
| 18/S | 2      | 16   | 8    | STR – KAN | class 1 <i>intI</i> – gene cassette – <i>aadA11</i><br><i>aph(3')-IIIa</i> |
| 19/S | 1      | 64   | 1    | STR       | -                                                                          |
| 20/S | 2      | 2    | 1    | -         | -                                                                          |
| 21/S | 2      | 2    | 0.5  | -         | -                                                                          |
| 22/S | 1      | 2    | 1    | -         | -                                                                          |
| 23/S | 2      | 2    | 1    | -         | -                                                                          |
| 24/S | 2      | 2    | 2    | -         | -                                                                          |
| 25/S | 2      | 2    | 1    | -         | -                                                                          |
| 26/S | 2      | 2    | 0.5  | -         | -                                                                          |
| 2/B  | 0.5    | 64   | 2    | STR       | <i>aadA9</i>                                                               |
| 3/B  | 0.5    | 8    | 1    | STR       | <i>aadA9</i>                                                               |
| 4/B  | ≤0.125 | 64   | 32   | STR – KAN | <i>aadA9</i>                                                               |
| 5/B  | 0.25   | 2    | 0.25 | -         | -                                                                          |
| 6/B  | 0.25   | 8    | 0.25 | STR       | -                                                                          |
| 7/B  | 0.25   | 8    | 2    | STR       | class 1 <i>intI</i> – gene cassette – <i>aadA9</i>                         |
| 9/B  | ≤0.125 | 64   | 32   | STR – KAN | <i>strA-strB</i>                                                           |
| 11/B | ≤0.125 | 2    | 2    | -         | -                                                                          |
| 12/B | 0.25   | 4    | 1    | -         | -                                                                          |
| 13/B | 0.25   | 8    | 4    | STR       | class 1 <i>intI</i>                                                        |
| 14/B | 0.5    | 4    | 0.25 | -         | -                                                                          |
| 15/B | ≤0.125 | 4    | 2    | -         | -                                                                          |
| 16/B | ≤0.125 | 2    | 2    | -         | -                                                                          |
| 18/B | 0.25   | 4    | 2    | -         | -                                                                          |
| 19/B | ≤0.125 | 2    | 1    | -         | -                                                                          |
| 20/B | ≤0.125 | 2    | 2    | -         | -                                                                          |
| 21/B | ≤0.125 | 32   | 2    | STR       | <i>aadA9</i>                                                               |
| 22/B | 0.5    | 32   | 1    | STR       | -                                                                          |
| 23/B | 0.5    | 64   | 2    | STR       | <i>aadA9</i>                                                               |
| 24/B | 0.5    | 32   | 4    | STR       | -                                                                          |
| 25/B | 0.5    | 64   | 0.5  | STR       | <i>aadA9</i>                                                               |
| 26/B | 1      | 64   | 2    | STR       | -                                                                          |
| 27/B | 0.5    | 2    | 2    | -         | -                                                                          |
| 29/B | 0.5    | 2    | 16   | KAN       | -                                                                          |
| 30/B | 0.5    | 2    | 4    | -         | -                                                                          |
| 31/B | 1      | 64   | 4    | STR       | -                                                                          |

|                                  |   |   |   |   |   |
|----------------------------------|---|---|---|---|---|
| <i>T. pyogenes</i><br>ATCC®19411 | 2 | 2 | 1 | - | - |
| <i>T. pyogenes</i><br>ATCC®49698 | 1 | 4 | 1 | - | - |

\* An isolate origin: ANT – antelope, O – sheep, K – caprine, Z – European bison, S – swine, B – bovine.

\*\* Antimicrobial: STR – streptomycin, KAN – kanamycin.
